# Supplementary material for: Facile formation of Fe-doped NiCoP hollow nanocages as bifunctional electrocatalysts for overall water splitting
Source: Royal Society of Chemistry journal article supplement (doi:10.1039/d1ce00415h), 2021-01-01
Supplement: d1ce00415h1.pdf [file d1ce00415h1.pdf]

## *Supporting Information*

### **Facile formation of Fe-doped NiCoP hollow nanocage as bifunctional electrocatalysts for overall water splitting**

Bin He<sup>ab</sup>, Chun-Qing Peng<sup>b</sup>, Feng Ye<sup>b</sup>, Hai-Wen Gao<sup>a</sup>, Yang Wang<sup>a</sup>, Ya-Wen Tang<sup>b</sup>, Qing-Li Hao<sup>a\*</sup>, Hong-Ke Liu<sup>b\*</sup> and Zhi Su<sup>b\*</sup>

<sup>a</sup>Key Laboratory for Soft Chemistry and Functional Materials, Nanjing University of Science and Technology, Ministry of Education, Nanjing 210094, China.

E-mail: qinglihao@njust.edu.cn

<sup>b</sup>Key Laboratory of Biofunctional Materials, College of Chemistry and Materials Science, Nanjing Normal University, Nanjing 210046, China.

E-mail: zhisu@nynu.edu.cn, liuhongke@nynu.edu.cn

**Table S1.** HER performances comparison of recently reported representative electrocatalysts in alkaline medium (1.0 M KOH, at 10 mA cm<sup>-2</sup>)

| <b>catalyst</b>                                            | <b>Overpotential (mV)</b> | <b>Reference</b> |
|------------------------------------------------------------|---------------------------|------------------|
| NiCoFeP                                                    | 147                       | This work        |
| MoS <sub>2</sub> -NiS <sub>2</sub> /NGF                    | 172                       | 1                |
| Co/ $\beta$ -Mo <sub>2</sub> C@NCNTs                       | 170                       | 2                |
| EBP@NG                                                     | 190                       | 3                |
| p-WCx NWs/CC                                               | 122                       | 4                |
| N-Ni <sub>3</sub> S <sub>2</sub> /NF                       | 110                       | 5                |
| Ni <sub>0.9</sub> Fe <sub>0.1</sub> PS <sub>3</sub> @MXene | 196                       | 6                |
| amorphous CoP/NF                                           | 143                       | 7                |
| MoS <sub>2</sub> /NiS                                      | 244                       | 8                |
| Co(OH) <sub>2</sub> @NCNTs@NF                              | 170                       | 9                |
| Mo-doped NiCoP                                             | 76                        | 10               |
| Ni <sub>3</sub> S <sub>2</sub> nanosheet arrays/NF         | 223                       | 11               |
| Fe-Ni <sub>2</sub> P/MoS <sub>x</sub> /NF                  | 112                       | 12               |
| Co@CNTs@DSCNCs                                             | 214                       | 13               |
| Co(OH) <sub>2</sub> @P-NiCo-LDH                            | 226                       | 14               |
| CFC-CNT-CoO <sub>x</sub> /CoP                              | 108                       | 15               |

**Table S2.** OER performances comparison of recently reported representative electrocatalysts in alkaline medium (1.0 M KOH, at 10 mA cm<sup>-2</sup>)

| <b>catalyst</b>                                         | <b>Overpotential (mV)</b> | <b>Reference</b> |
|---------------------------------------------------------|---------------------------|------------------|
| NiCoFeP                                                 | 235                       | This work        |
| Ni <sub>3</sub> N-NiMoN                                 | 277                       | 16               |
| FeCo-FeCoP@C@NCCs                                       | 280                       | 17               |
| amorphous CoP/NF                                        | 284                       | 7                |
| CP/CTS/Co-S                                             | 190                       | 18               |
| Ni <sub>3</sub> S <sub>2</sub> @NGCLs/NF                | 271                       | 19               |
| MoS <sub>2</sub> -NiS <sub>2</sub> /NGF                 | 370                       | 1                |
| Ni <sub>3</sub> S <sub>2</sub> @MoS <sub>2</sub> /FeOOH | 260                       | 20               |
| Co <sub>6</sub> W <sub>6</sub> C@NC                     | 286                       | 21               |
| CoS <sub>2</sub> HNSs                                   | 290                       | 22               |
| S-CoWP@(S,N)-C                                          | 280                       | 23               |
| FeNiB/FeNi foam-700                                     | 272                       | 24               |
| Ni <sub>6</sub> Fe <sub>2</sub> W-LDH@CC                | 264                       | 25               |
| CoMoN <sub>x</sub> -500 NSAs/NF                         | 231                       | 26               |
| CdP <sub>2</sub> -CDs-CoP                               | 285                       | 27               |
| CoFeP/CoP/CC                                            | 240                       | 28               |

**Table S3.** Overall water splitting performances of our sample compared with recently reported representative electrocatalysts in alkaline electrolytes

| <b>catalyst</b>                                                      | <b>Potential (V) at 10 mA cm<sup>-2</sup></b> | <b>Reference</b> |
|----------------------------------------------------------------------|-----------------------------------------------|------------------|
| NiCoFeP                                                              | 1.60                                          | This work        |
| CoTe <sub>2</sub> @NCNTFs                                            | 1.67                                          | 29               |
| MoS <sub>2</sub> -NiS <sub>2</sub> /NGF                              | 1.64                                          | 1                |
| Ni <sub>3</sub> S <sub>2</sub> @NGCLs/NF                             | 1.55                                          | 19               |
| NiS/Ni <sub>2</sub> P                                                | 1.67                                          | 30               |
| CoP/NCNHP                                                            | 1.64                                          | 31               |
| Fe-CoP HTPAs                                                         | 1.59                                          | 32               |
| CoTeNR/NF                                                            | 1.64                                          | 33               |
| A-NiSe <sub>2</sub> P                                                | 1.62                                          | 34               |
| FeCo-FeCoP@C                                                         | 1.64                                          | 17               |
| CoxP                                                                 | 1.72                                          | 35               |
| CoNi <sub>2</sub> S <sub>4</sub> /Ni <sub>3</sub> S <sub>2</sub> @NF | 1.65                                          | 36               |
| Co <sub>9</sub> S <sub>8</sub> /Cu <sub>2</sub> S/CF                 | 1.6                                           | 37               |
| Fe-Ni <sub>3</sub> P <sub>4</sub> /NiFeOH                            | 1.55                                          | 38               |
| CuO@CoZn-LDH/CF                                                      | 1.55                                          | 39               |

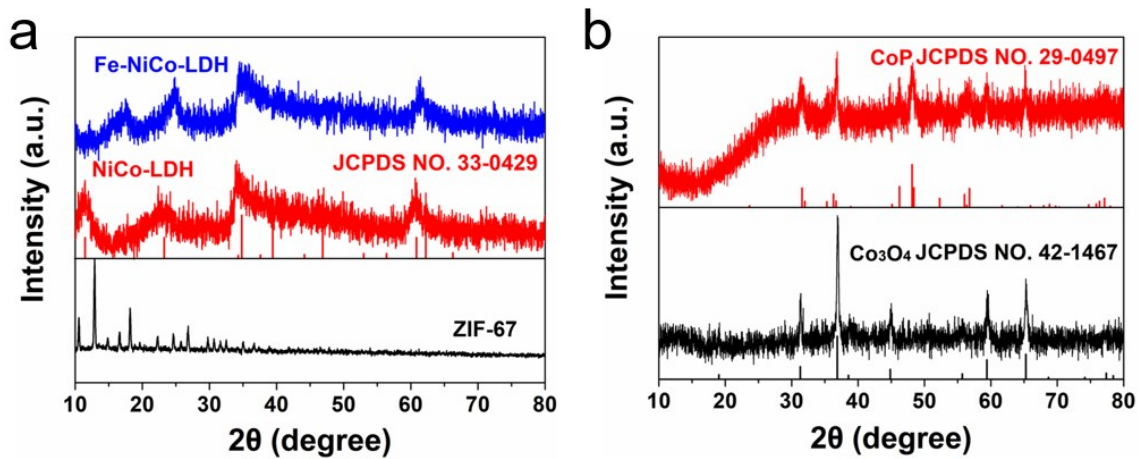

**Fig. S1.** (a) XRD pattern of the as-prepared ZIF-67, NiCo-LDH and Fe-NiCo-LDH samples; (b) XRD pattern of the as-prepared Co<sub>3</sub>O<sub>4</sub> and CoP samples.

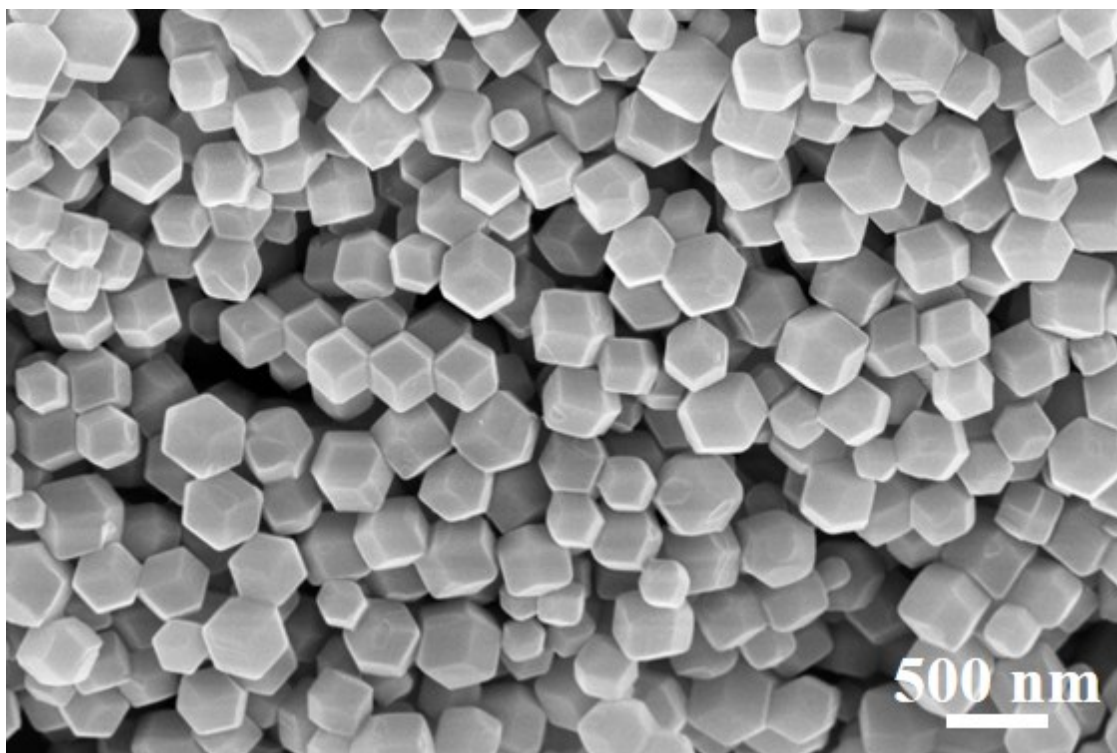

**Fig. S2.** SEM image of ZIF-67.

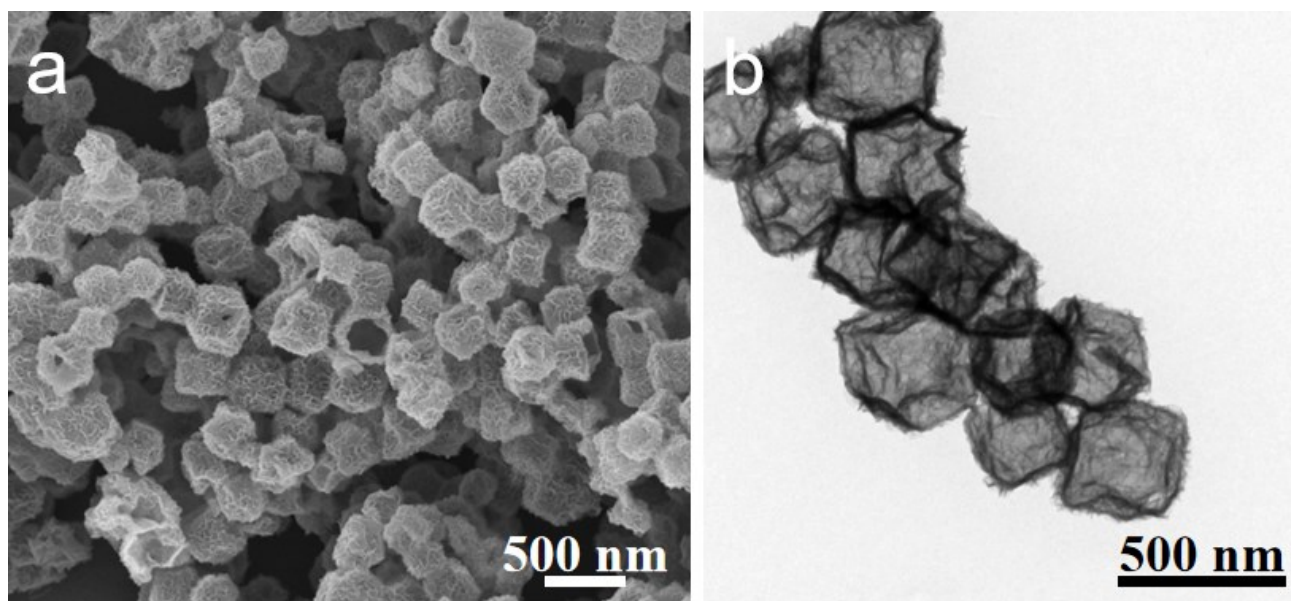

**Fig. S3.** (a, b) SEM and TEM images of NiCo-LDH.

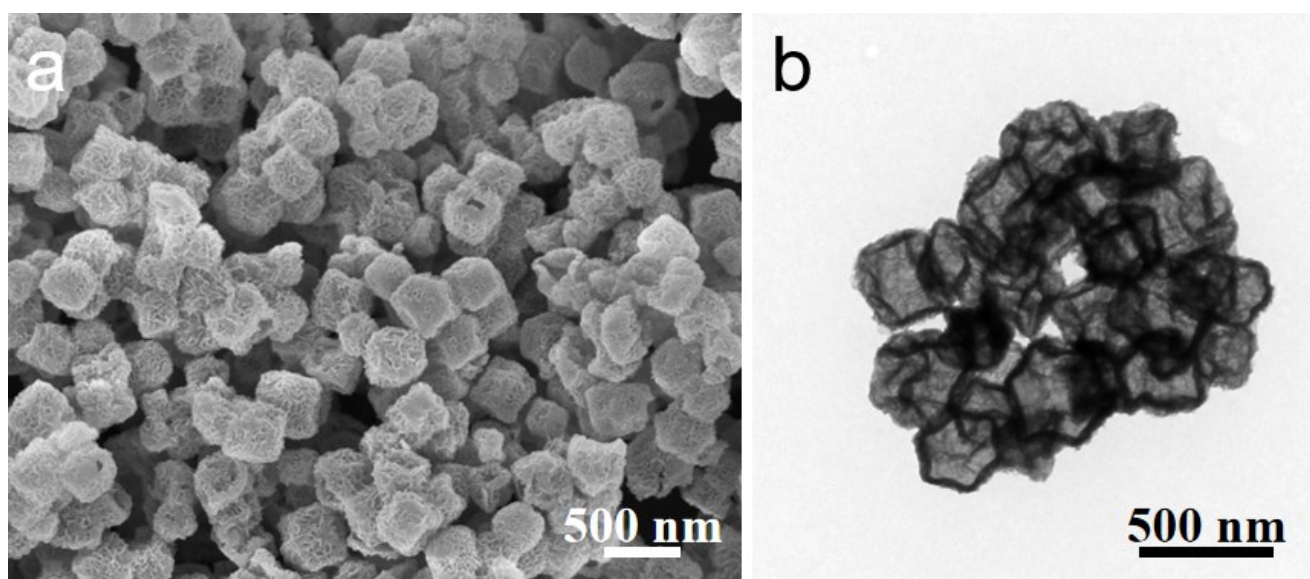

**Fig. S4.** (a, b) SEM and TEM images of Fe-NiCo-LDH.

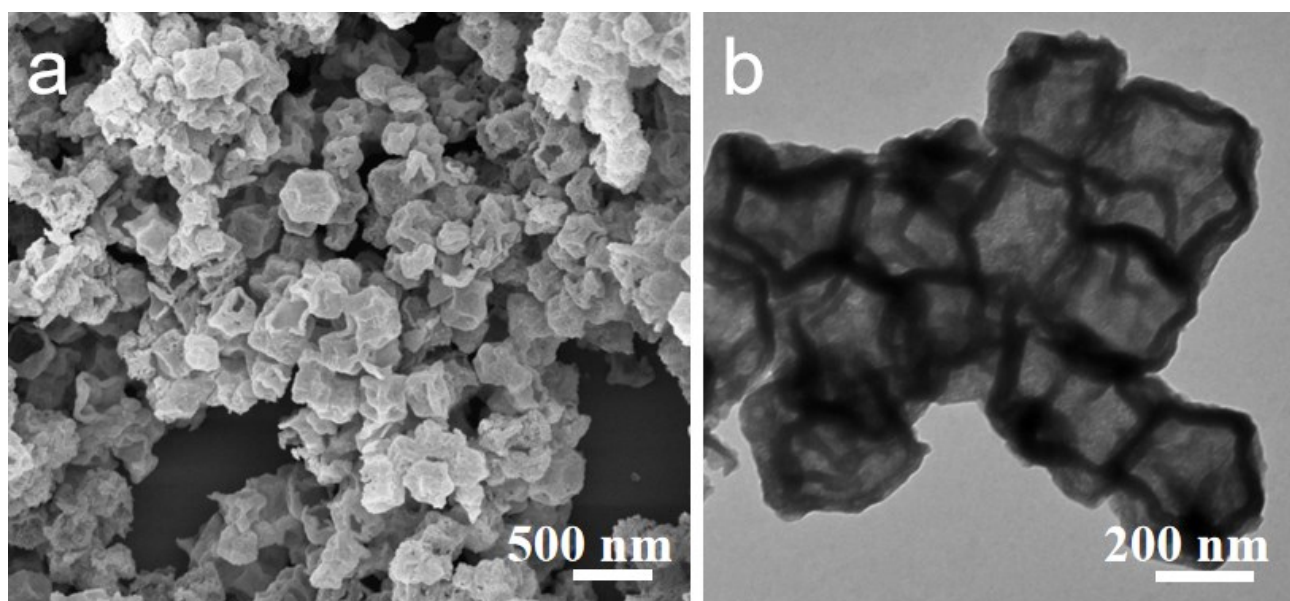

Fig. S5. (a, b) SEM and TEM images of NiCoP.

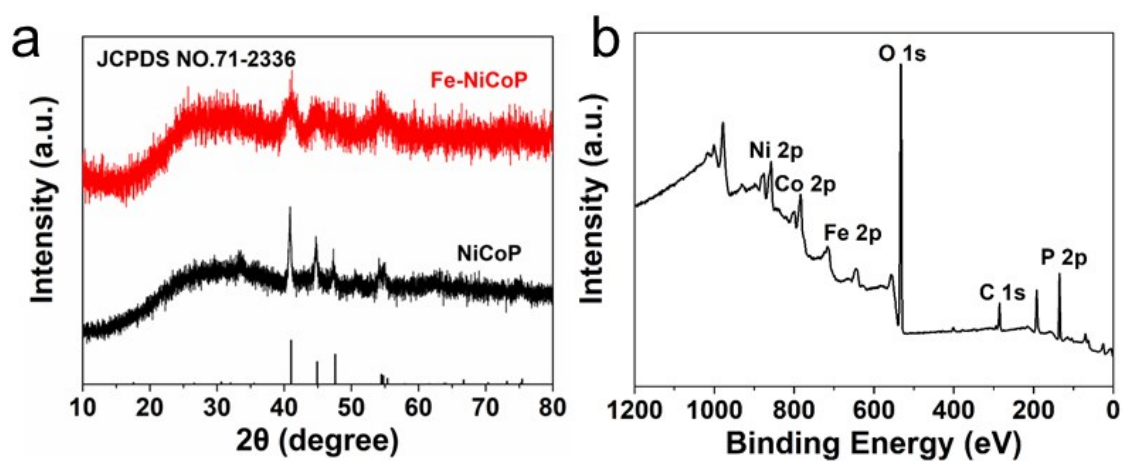

Fig. S6. (a) XRD pattern of the as-prepared NiCoP and Fe-NiCoP samples; (b) XPS survey spectra of Fe-NiCoP sample.

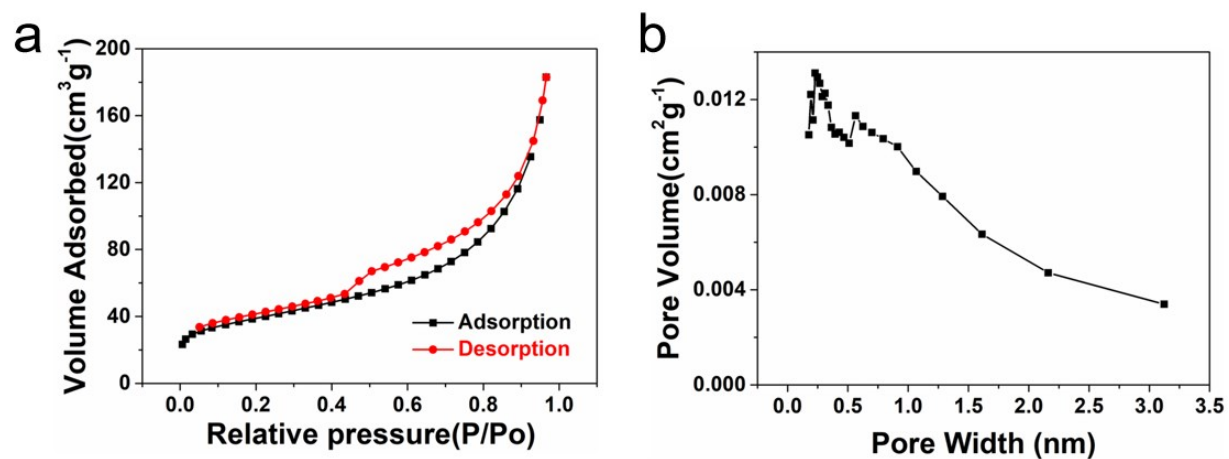



**Fig. S7.** (a,b) N<sub>2</sub> adsorption-desorption isotherms and pore size distribution of the as-prepared Fe-NiCoP.

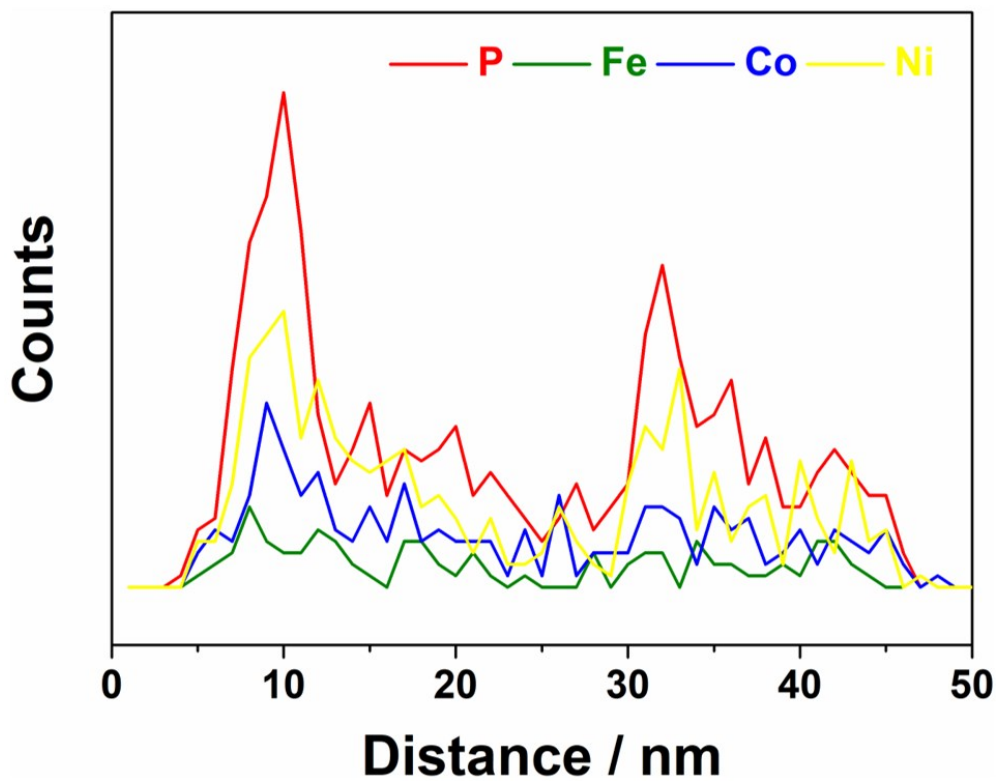

**Fig. S8.** EDX cross-sectional line scan profiles of the Fe-NiCoP sample.

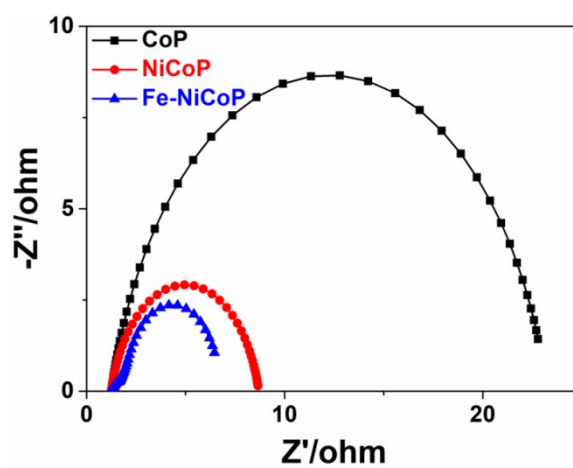

**Fig. S9.** Nyquist plots of CoP, NiCoP, and Fe-NiCoP samples.



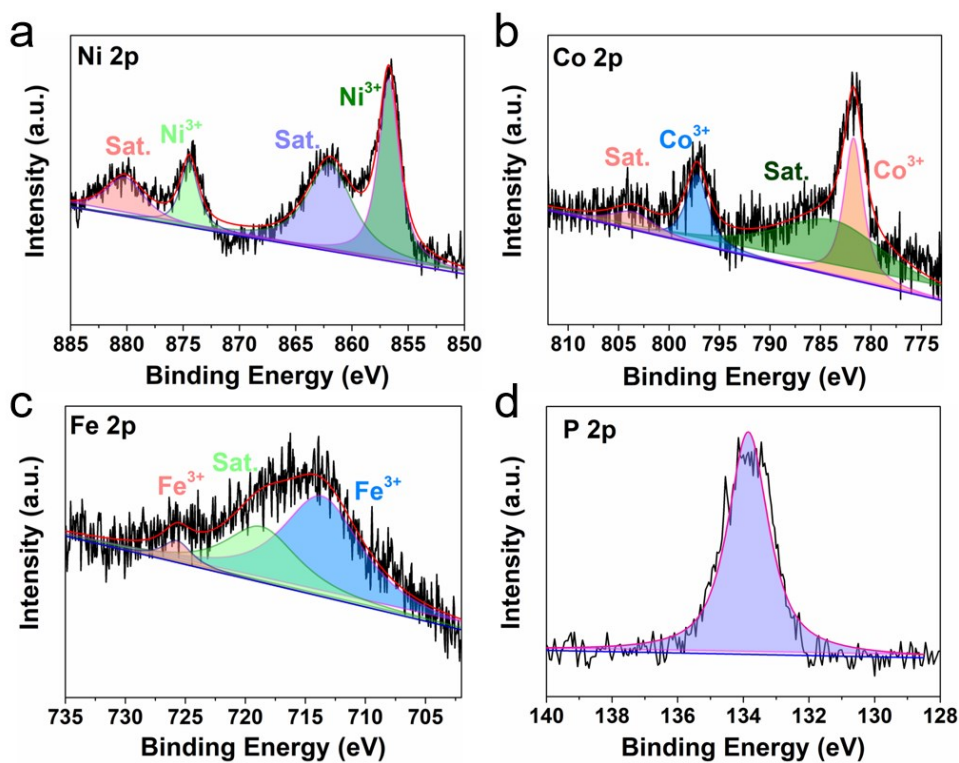

**Fig. S10.** XPS spectra of the Fe-NiCoP after OER test: (a) Ni 2p, (b) Co 2p, (c) Fe 2p, and (d) P 2p.

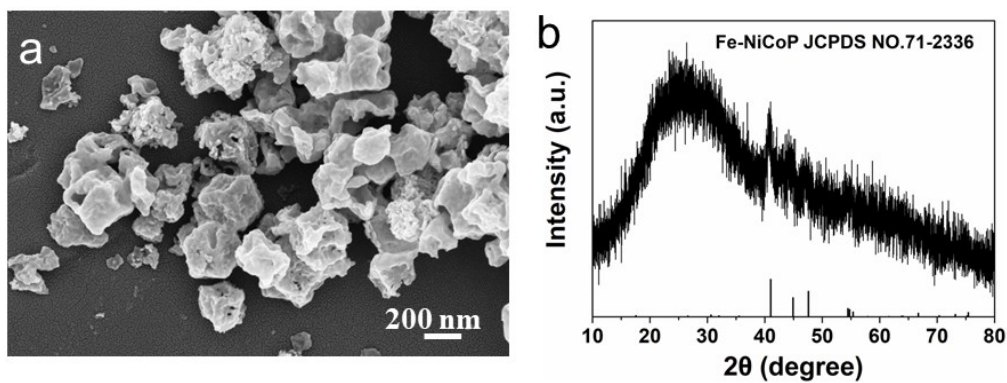

**Fig. S11.** (a) SEM and (b) XRD pattern for Fe-NiCoP after HER test.

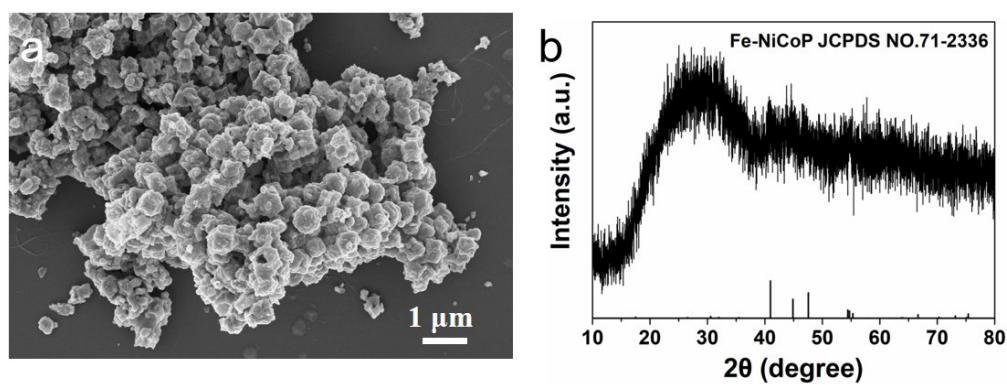

**Fig. S12.** (a) SEM and (b) XRD pattern for Fe-NiCoP after OER test.

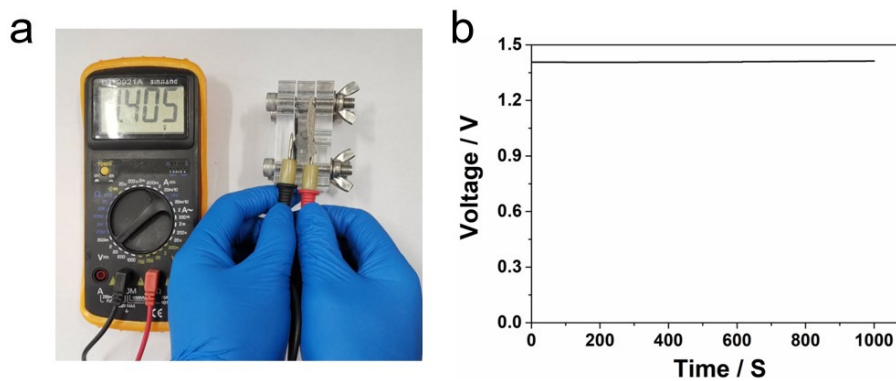

**Fig. S13.** (a,b) Open-circuit voltage plot of the Fe-NiCoP + Pt/C based Zn-air battery.

## References

- 1 P. Kuang, M. He, H. Zou, J. Yu and K. Fan, 0D/3D MoS<sub>2</sub>-NiS<sub>2</sub>/N-doped graphene foam composite for efficient overall water splitting, *Appl. Catal. B: Environ.*, 2019, **254**, 15-25.
- 2 T. Ouyang, Y. Q. Ye, C. Y. Wu, K. Xiao and Z. Q. Liu, Heterostructures Composed of N-Doped Carbon Nanotubes Encapsulating Cobalt and beta-Mo<sub>2</sub>C Nanoparticles as Bifunctional Electrodes for Water Splitting, *Angew. Chem. Int. Ed.*, 2019, **58**, 4923-4928.
- 3 Z. Yuan, J. Li, M. Yang, Z. Fang, J. Jian, D. Yu, X. Chen and L. Dai, Ultrathin Black Phosphorus-on-Nitrogen Doped Graphene for Efficient Overall Water Splitting: Dual Modulation Roles of Directional Interfacial Charge Transfer, *J. Am. Chem. Soc.*, 2019, **141**, 4972-4979.
- 4 B. Ren, D. Li, Q. Jin, H. Cui and C. Wang, Novel porous tungsten carbide hybrid nanowires on carbon cloth for high-performance hydrogen evolution, *J. Mater. Chem. A*, 2017, **5**, 13196-13203.
- 5 P. Chen, T. Zhou, M. Zhang, Y. Tong, C. Zhong, N. Zhang, L. Zhang, C. Wu and Y. Xie, 3D Nitrogen-Anion-Decorated Nickel Sulfides for Highly Efficient Overall Water Splitting, *Adv. Mater.*, 2017, **29**, 1701584.
- 6 C.-F. Du, K. N. Dinh, Q. Liang, Y. Zheng, Y. Luo, J. Zhang and Q. Yan, Self-Assemble and In Situ Formation of Ni<sub>1-x</sub>Fe<sub>x</sub>PS<sub>3</sub>Nanomosaic-Decorated MXene Hybrids for Overall Water Splitting, *Adv. Energy Mater.*, 2018, **8**, 1801127.
- 7 R. Beltrán-Suito, P. W. Menezes and M. Driess, Amorphous outperforms crystalline nanomaterials: surface modifications of molecularly derived CoP electro(pre)catalysts for efficient water-splitting, *J. Mater. Chem. A*, 2019, **7**, 15749-15756.
- 8 Q. Qin, L. Chen, T. Wei and X. Liu, MoS<sub>2</sub> /NiS<sub>2</sub> Yolk-Shell Microsphere-Based Electrodes for Overall Water Splitting and Asymmetric Supercapacitor, *Small*, 2019, **15**, 1803639.
- 9 P. Guo, J. Wu, X.-B. Li, J. Luo, W.-M. Lau, H. Liu, X.-L. Sun and L.-M. Liu, A highly stable bifunctional catalyst based on 3D Co(OH)<sub>2</sub>@NCNTs@NF towards overall water-splitting, *Nano Energy*, 2018, **47**, 96-104.
- 10 J. Lin, Y. Yan, C. Li, X. Si, H. Wang, J. Qi, J. Cao, Z. Zhong, W. Fei and J. Feng, Bifunctional Electrocatalysts Based on Mo-Doped NiCoP Nanosheet Arrays for Overall Water Splitting, *Nano-Micro Letters*, 2019, **11**, 55.
- 11 L. L. Feng, G. Yu, Y. Wu, G. D. Li, H. Li, Y. Sun, T. Asefa, W. Chen and X. Zou, High-index faceted Ni<sub>3</sub>S<sub>2</sub> nanosheet arrays as highly active and ultrastable electrocatalysts for water splitting, *J Am Chem. Soc.*, 2015, **137**, 14023-14026.
- 12 X. Zhang, C. Liang, X. Qu, Y. Ren, J. Yin, W. Wang, M. Yang, W. Huang and X. Dong, Sandwich-Structured Fe-Ni<sub>2</sub>P/MoS<sub>x</sub>/NF Bifunctional Electrocatalyst for Overall Water Splitting, *Adv. Mater. Interfaces*, 2020, **7**, 1901926.
- 13 X. Z. Song, H. Wang, Z. X. Li, Y. L. Meng, Z. Q. Tan and M. Zhu, Double-shelled carbon nanocages grafted with carbon nanotubes embedding Co nanoparticles for enhanced hydrogen evolution electrocatalysis, *Chem. Commun.*, 2021, **57**, 3022-3025.
- 14 N. Song, S. H. Hong, M. Y. Xiao, Y. Zuo, E. H. Jiang, C. M. Li, H. J. Dong, Fabrication of Co(Ni)-P surface bonding states on core-shell Co(OH)<sub>2</sub>@P-NiCo-LDH towards electrocatalytic hydrogen evolution reaction, *J. Colloid. Interface Sci.*, 2021, **582**, 535-542.
- 15 J. Zhan, X. Cao, J. M. Zhou, G. Xu, B. Lei and M. H. Wu, Porous array with CoP nanoparticle modification derived from MOF grown on carbon cloth for effective alkaline hydrogen evolution, *Chem. Eng. J.*, 2021, **416**, 128943.
- 16 A. Wu, Y. Xie, H. Ma, C. Tian, Y. Gu, H. Yan, X. Zhang, G. Yang and H. Fu, Integrating the active OER and HER components as the heterostructures for the efficient overall water splitting, *Nano Energy*, 2018, **44**, 353-363.
- 17 Y. Li, S. Li, J. Hu, Y. Zhang, Y. Du, X. Han, X. Liu and P. Xu, Hollow FeCo-FeCoP@C nanocubes embedded in nitrogen-doped carbon nanocages for efficient overall water splitting, *J. Energy Chem.*, 2021, **53**, 1-8.

- 18 J. Wang, H. X. Zhong, Z. L. Wang, F. L. Meng and X. B. Zhang, Integrated Three-Dimensional Carbon Paper/Carbon Tubes/Cobalt-Sulfide Sheets as an Efficient Electrode for Overall Water Splitting, *ACS Nano*, 2016, **10**, 2342-2348.
- 19 B. Li, Z. Li, Q. Pang and J. Z. Zhang, Core/shell cable-like Ni<sub>3</sub>S<sub>2</sub> nanowires/N-doped graphene-like carbon layers as composite electrocatalyst for overall electrocatalytic water splitting, *Chem. Eng. J.*, 2020, **401**, 126045.
- 20 M. Zheng, K. Guo, W.-J. Jiang, T. Tang, X. Wang, P. Zhou, J. Du, Y. Zhao, C. Xu and J.-S. Hu, When MoS<sub>2</sub> meets FeOOH: A “one-stone-two-birds” heterostructure as a bifunctional electrocatalyst for efficient alkaline water splitting, *Appl. Catal. B: Environ.*, 2019, **244**, 1004-1012.
- 21 J. Chen, B. Ren, H. Cui and C. Wang, Constructing Pure Phase Tungsten-Based Bimetallic Carbide Nanosheet as an Efficient Bifunctional Electrocatalyst for Overall Water Splitting, *Small*, 2020, **16**, 1907556.
- 22 X. Ma, W. Zhang, Y. Deng, C. Zhong, W. Hu and X. Han, Phase and composition controlled synthesis of cobalt sulfide hollow nanospheres for electrocatalytic water splitting, *Nanoscale*, 2018, **10**, 4816-4824.
- 23 B. Weng, C. R. Grice, W. Meng, L. Guan, F. Xu, Y. Yu, C. Wang, D. Zhao and Y. Yan, Metal-Organic Framework-Derived CoWP@C Composite Nanowire Electrocatalyst for Efficient Water Splitting, *ACS Energy Lett.*, 2018, **3**, 1434-1442.
- 24 H. Yuan, S. Wang, X. Gu, B. Tang, J. Li and X. Wang, One-step solid-phase boronation to fabricate self-supported porous FeNiB/FeNi foam for efficient electrocatalytic oxygen evolution and overall water splitting, *J. Mater. Chem. A*, 2019, **33**, 19554-19564.
- 25 J. Xu, M. Wang, F. Yang, X. Ju and X. Jia, Self-Supported Porous Ni-Fe-W Hydroxide Nanosheets on Carbon Fiber: A Highly Efficient Electrode for Oxygen Evolution Reaction, *Inorg Chem*, 2019, **58**, 13037-13048.
- 26 Y. K. Lu, Z. X. Li, Y. L. Xu, L. Q. Tang, S. J. Xu, D. Li, J. J. Zhu and D. L. Jiang, Bimetallic Co-Mo nitride nanosheet arrays as high-performance bifunctional electrocatalysts for overall water splitting, *Chem. Eng. J.*, 2021, **411**, 128433.
- 27 Y. Bai, L. C. Zhang, Q. L. Li, Y. K. Wu, Y. P. Wang, M. W. Xu and S. J. Bao, Self-Supported CdP2-CDs-CoP for High-Performance OER Catalysts, *ACS Sustainable Chem. Eng.* 2021, **9**, 1297-1303.
- 28 D. L. Jiang, S. J. Xu, B. Quan, C. C. Liu, Y. K. Lu, J. J. Zhu, D. Tian and D. Li, Synergistically coupling of Fe-doped CoP nanocubes with CoP nanosheet arrays towards enhanced and robust oxygen evolution electrocatalysis, *J. Colloid. Interface Sci.*, 2021, **591**, 67-75.
- 29 X. Wang, X. Huang, W. Gao, Y. Tang, P. Jiang, K. Lan, R. Yang, B. Wang and R. Li, Metal-organic framework derived CoTe<sub>2</sub> encapsulated in nitrogen-doped carbon nanotube frameworks: a high-efficiency bifunctional electrocatalyst for overall water splitting, *J. Mater. Chem. A*, 2018, **6**, 3684-3691.
- 30 X. Xiao, D. Huang, Y. Fu, M. Wen, X. Jiang, X. Lv, M. Li, L. Gao, S. Liu, M. Wang, C. Zhao and Y. Shen, Engineering NiS/Ni<sub>2</sub>P Heterostructures for Efficient Electrocatalytic Water Splitting, *ACS Appl. Mater. Interfaces*, 2018, **10**, 4689-4696.
- 31 Y. Pan, K. Sun, S. Liu, X. Cao, K. Wu, W. C. Cheong, Z. Chen, Y. Wang, Y. Li, Y. Liu, D. Wang, Q. Peng, C. Chen and Y. Li, Core-Shell ZIF-8@ZIF-67-Derived CoP Nanoparticle-Embedded N-Doped Carbon Nanotube Hollow Polyhedron for Efficient Overall Water Splitting, *J. Am. Chem. Soc.*, 2018, **140**, 2610-2618.
- 32 L. E. Hu, Q. J. Ning, D. Zhao, C. Xu, Y. Lin, Y. Zhong, Z. Zhang, Y. Wang and Y. Hu, A Room-Temperature Postsynthetic Ligand Exchange Strategy to Construct Mesoporous Fe-Doped CoP Hollow Triangle Plate Arrays for Efficient Electrocatalytic Water Splitting, *Small*, 2018, **14**, 1704233.
- 33 L. Yang, H. Xu, H. Liu, D. Cheng and D. Cao, Active Site Identification and Evaluation Criteria of In Situ Grown CoTe and NiTe Nanoarrays for Hydrogen Evolution and Oxygen Evolution Reactions, *Small Methods*, 2019, **3**, 1900113.
- 34 J. Lin, H. Wang, J. Cao, F. He, J. Feng and J. Qi, Engineering Se vacancies to promote the intrinsic activities of

- P doped NiSe<sub>2</sub> nanosheets for overall water splitting, *J. Colloid. Interface Sci.*, 2020, **571**, 260-266.
- 35 J.-S. Li, L.-X. Kong, Z. Wu, S. Zhang, X.-Y. Yang, J.-Q. Sha and G.-D. Liu, Polydopamine-assisted construction of cobalt phosphide encapsulated in N-doped carbon porous polyhedrons for enhanced overall water splitting, *Carbon*, 2019, **145**, 694-700.
- 36 W. Dai, K. Ren, Y.-A. Zhu, Y. Pan, J. Yu and T. Lu, Flower-like CoNi<sub>2</sub>S<sub>4</sub>/Ni<sub>3</sub>S<sub>2</sub> nanosheet clusters on nickel foam as bifunctional electrocatalyst for overall water splitting, *J. Alloy. Compd.*, 2020, **844**, 156252.
- 37 Z. H. Zang, X. W. Wang, X. Li, Q. L. Zhao, L. L. Li, X. J. Yang, X. F. Yu, X. H. Zhang and Z. M. Lu, Co<sub>9</sub>S<sub>8</sub> Nanosheet Coupled Cu<sub>2</sub>S Nanorod Heterostructure as Efficient Catalyst for Overall Water Splitting, *ACS Appl. Mater. Interfaces* 2021, **13**, 9865-9874.
- 38 C. F. Li, J. W. Zhao, L. J. Xie, J. Q. Wu and G. R. Li, Fe doping and oxygen vacancy modulated Fe-Ni<sub>3</sub>P<sub>4</sub>/NiFeOH nanosheets as bifunctional electrocatalysts for efficient overall water splitting, *Appl. Catal. B: Environ.*, 2021, **291**, 119987.
- 39 L. L. Yin, X. Du, C. Z. Di, M. W. Wang, K. M. Su and Z. H. Li, In-situ transformation obtained defect-rich porous hollow CuO@CoZn-LDH nanoarrays as self-supported electrode for highly efficient overall water splitting, *Chem. Eng. J.*, 2021, **414**, 128809.
